# Supplementary material for: Exposure to endocrine disruptors promotes biofilm formation and contributes to increased virulence of Pseudomonas aeruginosa
Source: PubMed Central journal article supplement (PMC10667657; doi:10.1111/1758-2229.13190), 2023-08-16
Supplement: EMI4-15-740-s001.pdf [file EMI4-15-740-s001.pdf]

Table S2

|                                                 | Forward Primer (5'-3') | Reverse primer (5'-3)      | Length (pb) | Function                               |
|-------------------------------------------------|------------------------|----------------------------|-------------|----------------------------------------|
| Virulence gene of <i>Pseudomonas aeruginosa</i> |                        |                            |             |                                        |
| <i>exoS</i>                                     | TCTACACCGGCATTCACTA    | CACGGAAAGTCTTCACTACC       | 147         | exoenzyme S                            |
| <i>fabV</i>                                     | AACCTTTACGAATTGACCGA   | TTGACGTCCTGCTCGTA          | 98          | enoyl-acyl-reductase                   |
| <i>fliC</i>                                     | CAGTCCACCAATATCCTGC    | GTATCGGAGATACGGGTCA        | 137         | flagellin                              |
| <i>pelE</i>                                     | <i>TGATCGGAGCGGTCG</i> | <i>CTGAACATCATGTCGAGGC</i> | 142         | extracellular polysaccharide (biofilm) |
| <i>rpoS</i>                                     | AACCTTCACCCGAAGAAATC   | AAGAGAGACGTCTACCGAA        | 104         | sigma factor                           |
| Reference gene                                  |                        | G                          |             |                                        |
